# Supplementary material for: Patterns of differential gene expression in adult rotation-resistant and wild-type western corn rootworm digestive tracts
Source: PubMed Central journal article supplement (PMC4516421; doi:10.1111/eva.12278), 2015-07-16

## Susceptible:

- ◆ Ames, IA
- ◇ Concord, NE
- ◆ Higginsville, MO

## Resistant:

- Shabbona, IL
- Minonk, IL
- Urbana, IL

## US Midwest

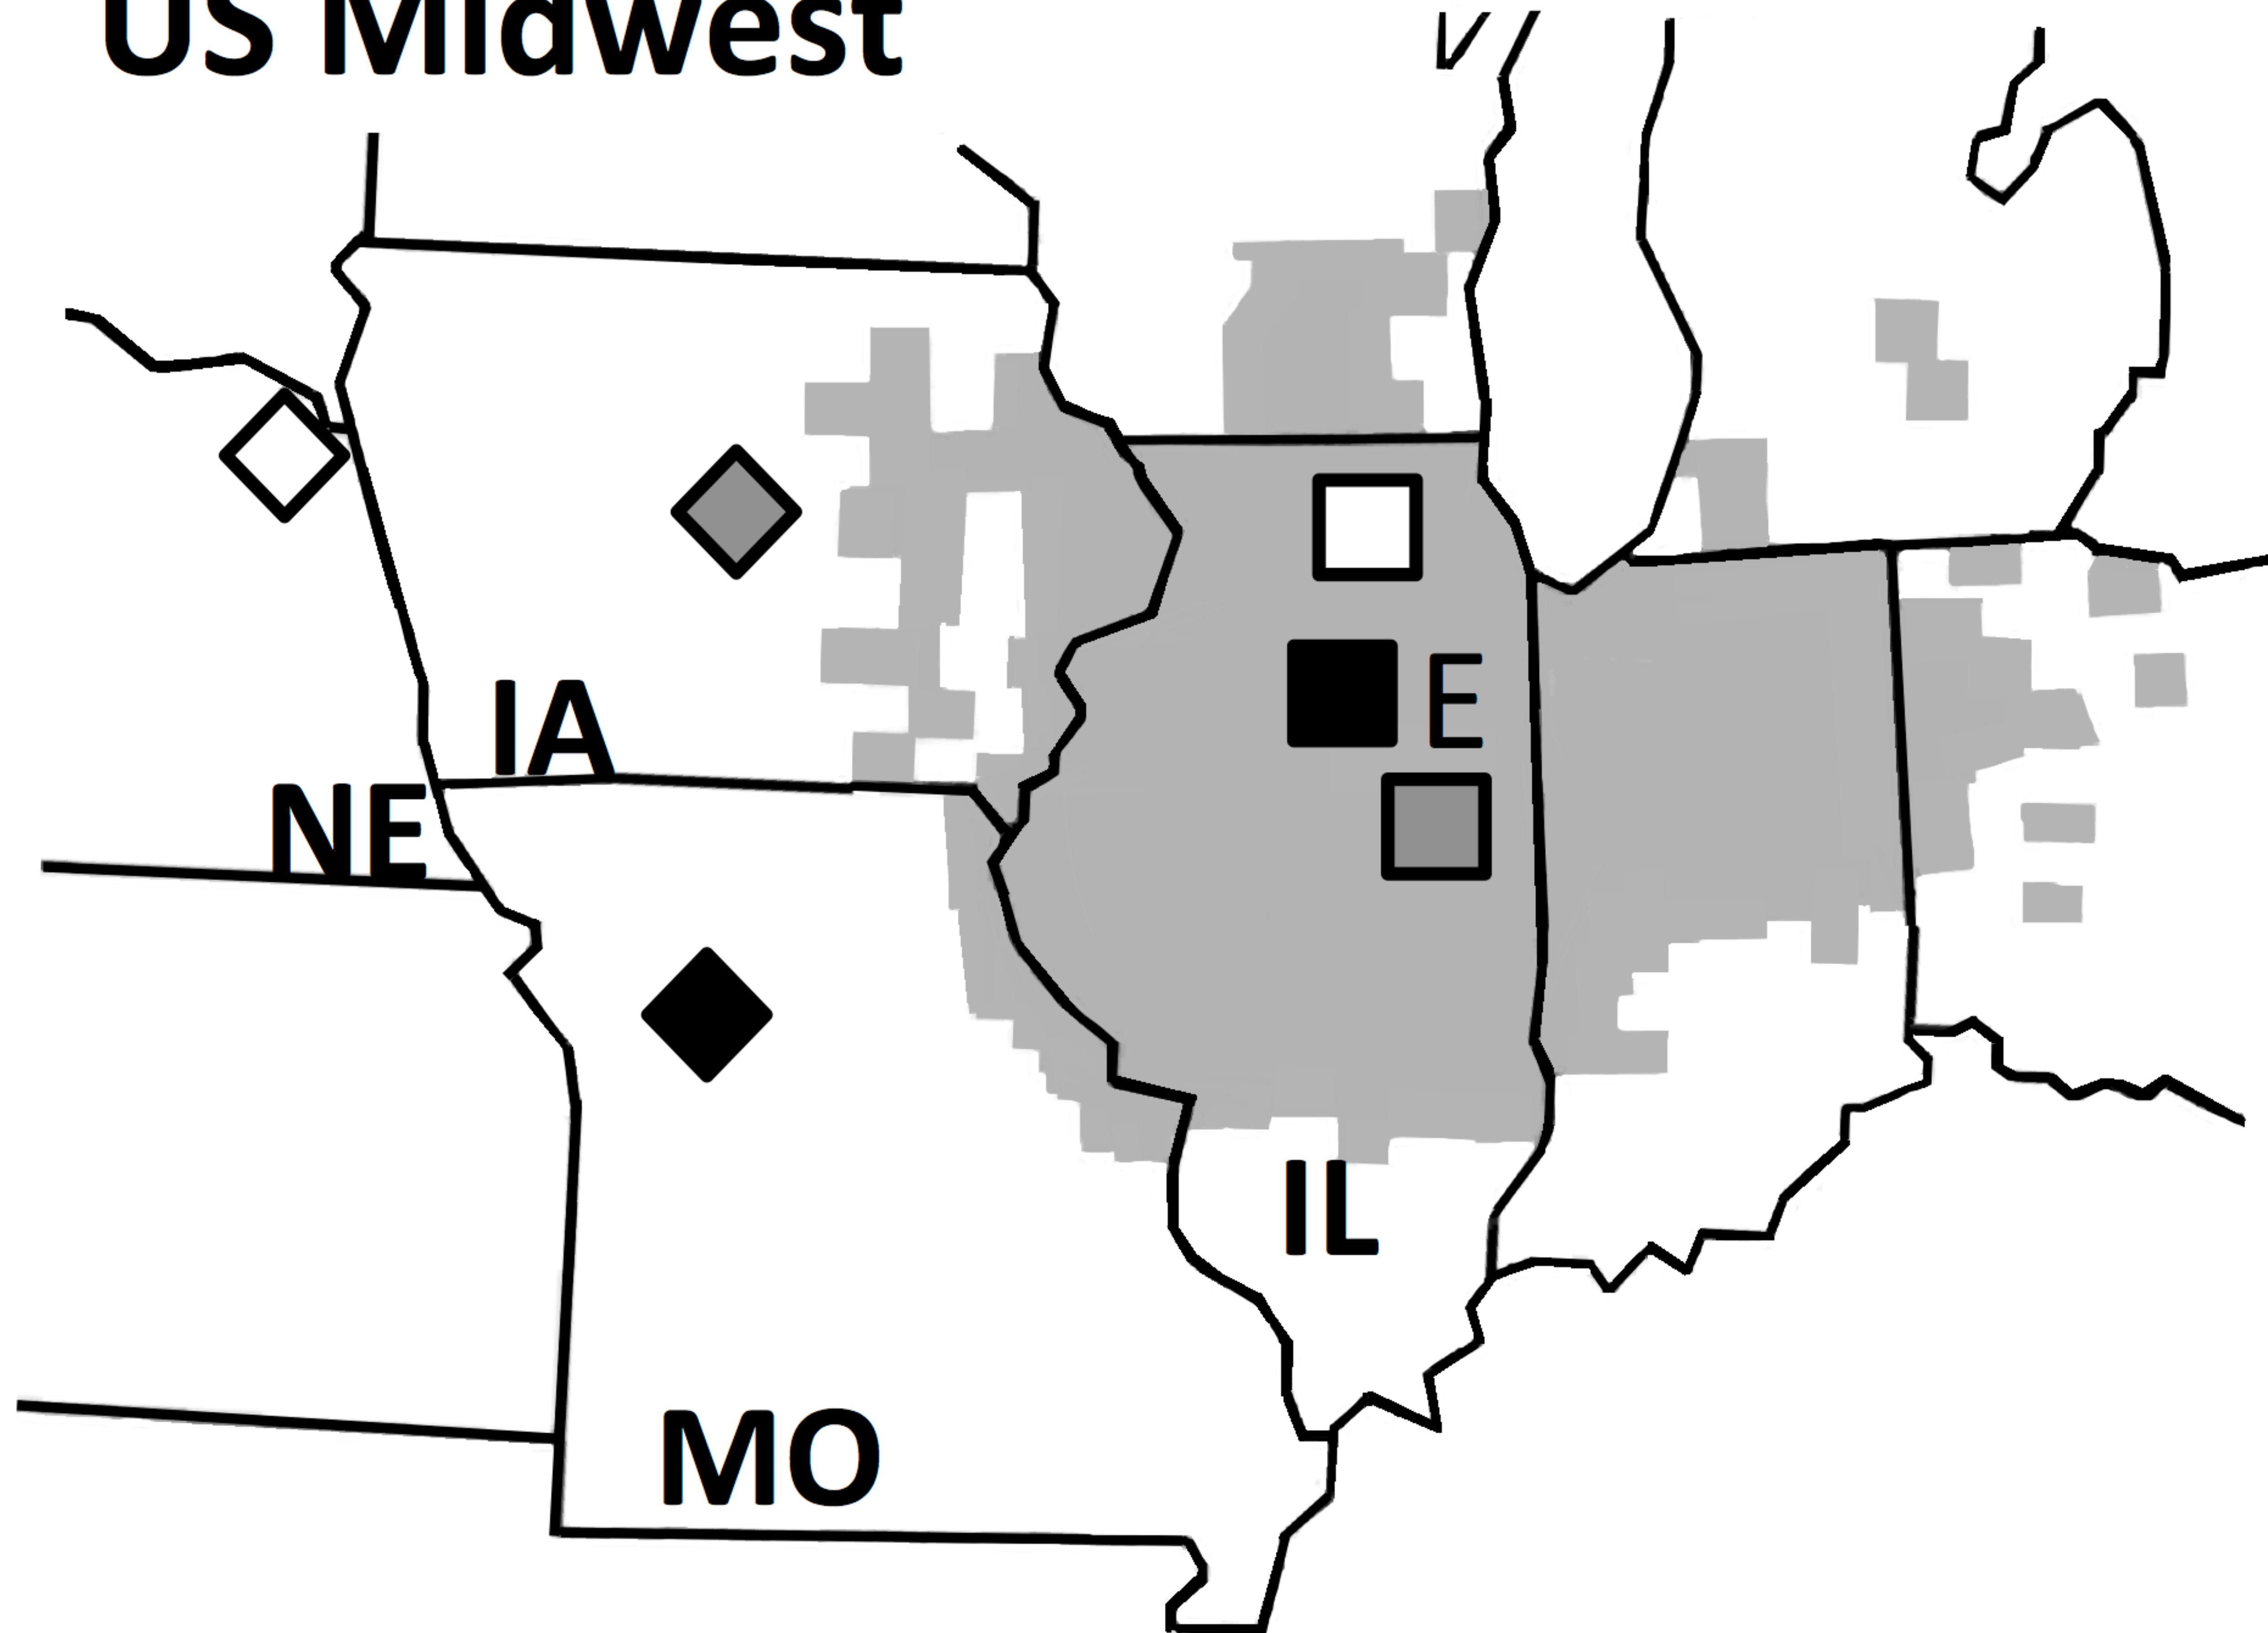

Supplement: eva0008-0692-sd1.pdf [file eva0008-0692-sd1.pdf]
