# Supplementary material for: Patterns of differential gene expression in adult rotation-resistant and wild-type western corn rootworm digestive tracts
Source: PubMed Central journal article supplement (PMC4516421; doi:10.1111/eva.12278), 2015-07-16

**A**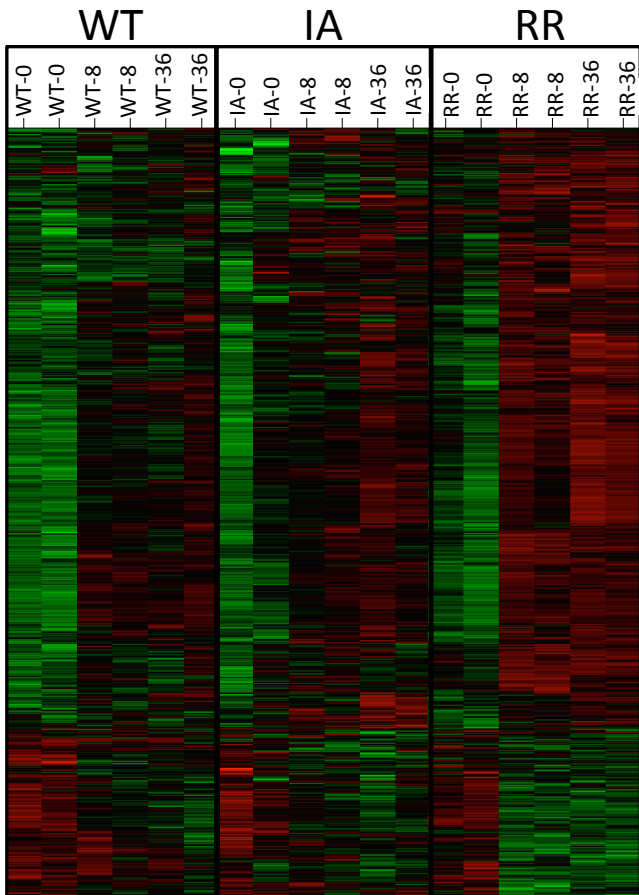**B**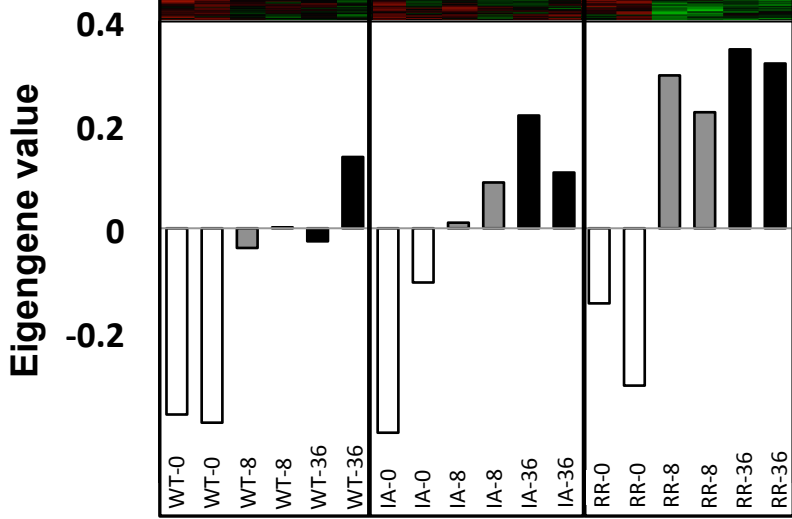

Supplement: eva0008-0692-sd3.pdf [file eva0008-0692-sd3.pdf]
